# Supplementary material
Source: Springer Nature journal article supplement (https://www.springermedizin.de/resource/supplementary/12871_2014_250_MOESM1_ESM.pdf/9429240)

# Patient risk, monitoring, fluid goal and surgical time

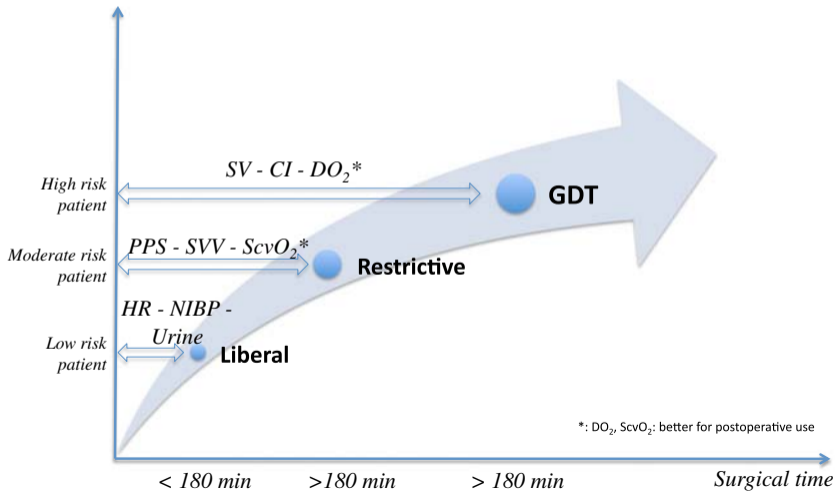

Supplement: MOESM1 [file 9429240]
